## RESEARCH ARTICLE

# Neuromuscular control of locomotion is altered by tail autotomy in geckos

Kevin Jagnandan<sup>1,\*</sup> and Timothy E. Higham<sup>2</sup>

## ABSTRACT

Animal locomotion is driven by underlying axial and appendicular musculature. In order for locomotion to be effective, these muscles must be able to rapidly respond to changes in environmental and physiological demands. Although virtually unstudied, muscles must also respond to morphological changes, such as those that occur with tail autotomy in lizards. Tail autotomy in leopard geckos (*Eublepharis macularius*) results in a 25% loss of caudal mass and significant kinematic alterations to maintain stability. To elucidate how motor control of the locomotor muscles is modulated with these shifts, we used electromyography (EMG) to quantify patterns of *in vivo* muscle activity in forelimb and hindlimb muscles before and after autotomy. Forelimb muscles (biceps brachii and triceps brachii) exhibited no changes in motor recruitment, consistent with unaltered kinematics after autotomy. The amplitude of activity of propulsive muscles of the hindlimbs (caudofemoralis and gastrocnemius) was significantly reduced and coincided with decreases in the propulsive phases of femur retraction and ankle extension, respectively. The puboischiotibialis did not exhibit these changes, despite significant reductions in femur depression and knee angle, suggesting that the reduction in mass and vertical ground-reaction force by autotomy allows for the maintenance of a more sprawled and stable posture without increasing motor recruitment of the support muscles. These results highlight the significant neuromuscular shifts that occur to accommodate dramatic changes in body size and mass distribution, and illuminate the utility of tail autotomy as a system for studying the neuromuscular control of locomotion.

**KEY WORDS:** Autotomy, Locomotion, Muscle Activity, Muscle function, Electromyography, Kinematics

## INTRODUCTION

Locomotion is fundamental to animal survival, where it is critical for prey capture and predator evasion. The ability to successfully accomplish these tasks often requires flexible locomotor strategies as animals encounter environmental and physiological demands (Irschick and Garland, 2001). Although strategies for meeting these demands can often be visibly observed through analyses of animal behavior and locomotor kinematics (Russell and Bels, 2001), it is the underlying muscles of the body and limbs that actuate these movements by driving propulsion, braking, and maintaining balance and stability (Roberts et al., 1997; Schilling et al., 2009).

<sup>1</sup>Life Sciences Department, San Diego City College, 1313 Park Boulevard, San Diego, CA 92101, USA. <sup>2</sup>Department of Evolution, Ecology and Organismal Biology, University of California, Riverside, 900 University Avenue, Riverside, CA 92521, USA.

\*Author for correspondence (kjagnandan@sdccd.edu)

 K.J., 0000-0002-4298-5333; T.E.H., 0000-0003-3538-6671

Received 20 February 2018; Accepted 16 July 2018

Studies of the modulation of neuromuscular control in response to locomotor challenges illuminate how animals navigate heterogeneous environments. Changes in surface grade, for example, alter the impact of gravity on the propulsive mechanisms (Irschick and Jayne, 1998; Daley and Biewener, 2003), thus requiring an adjustment in the level of muscle activity of hip extensors and femur retractors to function effectively (Pierotti et al., 1989; Carlson-Kuhta et al., 1998; Gillis and Biewener, 2002; Higham and Jayne, 2004a; Schilling et al., 2009). Shifts in the timing of muscle activity can also occur with changes in structural demands (Foster and Higham, 2014) or sudden environmental perturbations (Marigold and Patla, 2002; Daley et al., 2009; Daley and Biewener, 2011).

Although the response of locomotor muscle activity and recruitment are well described in regard to environmental demands, how muscle function can rapidly adapt to alterations in body form, such as changes in mass, is relatively unexplored (Gillis and Biewener, 2003; Gillis and Higham, 2016; Jagnandan and Higham, 2018). Muscles play a pivotal role in the movement and support of body mass (Marsh, 1999), yet few data exist on how limb muscles adapt to changes in loading. The neuromuscular changes that occur with changes in mass have been briefly addressed in animals and humans carrying artificial loads, in which there is evidence of increased demand and recruitment of muscles for support and stability with the added mass (Ellerby and Marsh, 2006; Griffin et al., 2003; McGowan et al., 2006, 2009). Although useful for understanding the adaptability of muscle, artificial loading experiments represent unnatural conditions that may limit ecological relevance.

Tail autotomy in lizards presents a fascinating system in which mass is lost rapidly from the caudal end as the tail is voluntarily shed from the rest of the body (Arnold, 1984). Unsurprisingly, this extreme behavioral response to perceived threats can have a substantial impact on the animal subsequent to the encounter (Bateman and Fleming, 2009; Higham et al., 2013). The tail can play important roles in jumping (Gillis et al., 2009, 2013; Kuo et al., 2012), vertical climbing (Jusuifi et al., 2008) and locomotor stability (Hsieh, 2016), each of which is negatively impacted following an autotomy event. The effects of autotomy on locomotor performance (e.g. sprint speed) are variable and dependent on the role of the tail in steady locomotion (Vitt et al., 1977; McElroy and Bergmann, 2013). Autotomy in the leopard gecko (*Eublepharis macularius*) is particularly interesting with respect to mass change because the tail of this species represents approximately 25% of the animal's mass, yet is readily autotomized when stimulated (Higham and Russell, 2010, 2012; Jagnandan et al., 2014; Jagnandan and Higham, 2017). Autotomy in this species induces a significant anterior shift in the center of mass (CoM) (Jagnandan et al., 2014; Jagnandan and Higham, 2017). In response, geckos alter joint kinematics and assume a more sprawled posture during locomotion to lower their CoM and counteract destabilizing effects. The response of the locomotor muscles to the change in the distribution of mass and

their roles in controlling the kinematic changes have not been previously examined.

Given the rapid loss of considerable mass, shift in the CoM and postural changes observed after autotomy in *E. macularius*, we examined the modulation of locomotor muscle activity using electromyography (EMG) in this species to determine whether and how the limb muscles are recruited differently after tail loss. We hypothesized that geckos must quickly alter motor output and activation of the limb muscles to compensate for the altered mass and CoM displacement. Specifically, we predicted that shifting the CoM anteriorly transfers the load distribution closer to the forelimbs, thus requiring greater recruitment and activation of forelimb muscles to support the increased load. Additionally, we expected a reduction in activity in the propulsive muscles of the hindlimb due to a lower requirement of the muscles to move the animal forward (i.e. less mass to move). Finally, we predicted that geckos will exhibit greater motor output to hindlimb muscles associated with lowering the CoM closer to the substrate and maintaining a more sprawled position throughout a stride.

## MATERIALS AND METHODS

### Study organisms

Ten adult *E. macularius* (Blyth 1854) (mass,  $30.7 \pm 1.7$  g; SVL,  $110.0 \pm 1.5$  mm; means  $\pm$  s.e.m.) with original tails were obtained from commercial suppliers and housed individually in terraria ( $50.8 \times 25.9 \times 32.0$  cm) maintained at 28–33°C. Geckos were fed a diet of live crickets *ad libitum*, but were fasted for 24 h prior to surgery and through to the end of the experimental trials.

### Surgery and experimental set-up

Using previous kinematic data of *E. macularius* (Fuller et al., 2011; Jagnandan et al., 2014) and literature on the anatomy and function of the appendicular musculature of this species (Zaaf et al., 1999), five muscles were selected for EMG implantation (Fig. 1). The biceps brachii and triceps brachii were implanted to record *in vivo* muscle activity associated with flexion and extension of the elbow, respectively, to assess the effects of the altered loading on the

anterior limbs. In the hindlimb, muscles hypothesized to drive the kinematic changes previously observed with autotomy were selected. These include the caudofemoralis (linked to retraction of the femur), the puboischiotibialis (linked to depression of the femur and flexion of the knee) and the gastrocnemius (linked to extension of the ankle).

Implantation of the EMG electrodes into each of these muscles followed an established surgical procedure (Higham and Jayne, 2004a). Lizards were anesthetized with an intramuscular injection of ketamine ( $100 \text{ mg kg}^{-1}$ ) prior to surgery. Fine-wire bipolar EMG electrodes were constructed following Jayne (1988) using 0.051 mm diameter polycoated stainless-steel wire (California Fine Wire Co., Grover Beach, CA, USA). Wires were inserted through the tip of a 26-gauge hypodermic needle used to implant the electrode through the skin and into the mid-belly of each muscle. EMG wires were then individually sutured to the skin, just proximal to the site of implantation and on the lizard's back, using 5-0 coated vicryl suture (Ethicon, Inc., Somerville, NJ, USA). This prevented the wires from pulling at the muscles and reduced the likelihood of accidental removal of the electrodes. Plastic model cement glue was then used to glue all of the electrodes into a single cable, which provided sufficient length for unrestricted movement of the lizard. Following the surgery, small dots of white nail polish were used to mark the center of the pectoral/pelvic girdles, shoulder/hip, elbow/knee, wrist/ankle and the metapodial–phalangeal joint of the middle toe of the right forelimbs and hindlimbs for concurrent kinematic analyses. Lizards were then placed individually into clean terraria and allowed to recover from anesthesia for at least 12 h.

Following full recovery from surgery and anesthesia, locomotor trials were observed for each lizard as it voluntarily walked on a level trackway ( $1.0 \times 0.13$  m) with sandpaper substrate to prevent slipping. Geckos were not coaxed to run down the trackway in order to avoid interference with the implanted EMG electrodes. A mirror mounted at 45 deg above the trackway provided a dorsal view for trials. Room temperature was maintained at approximately 30°C. Lizards were recorded before and after autotomy, which was initiated at the proximal-most fracture plane by gently pinching the base of the tail.

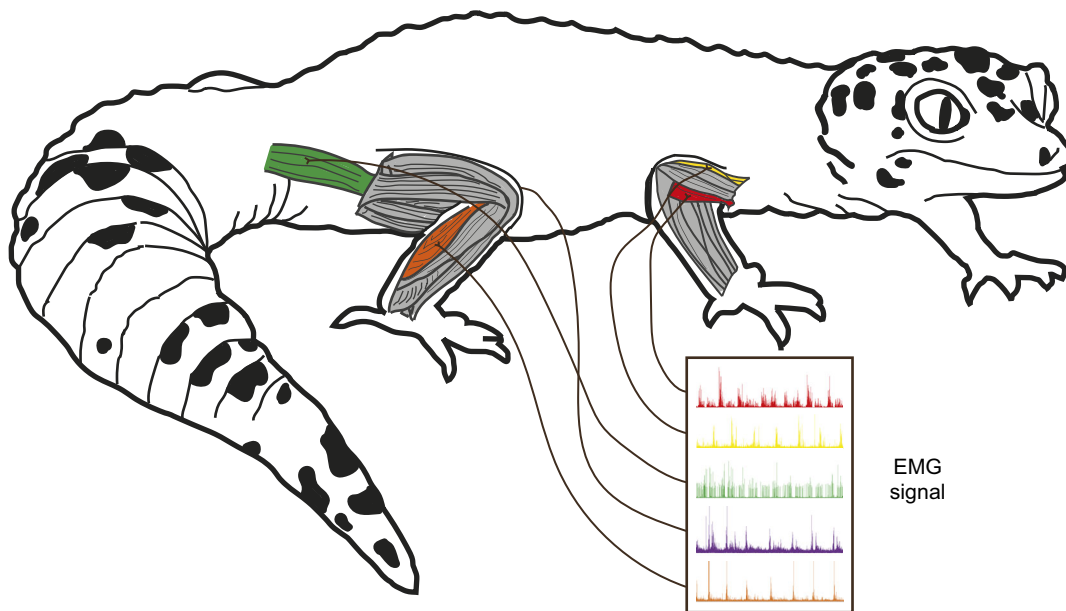

**Fig. 1. Locations of muscles implanted in *Eublepharis macularius* with electromyography (EMG) electrodes.** EMG signals from top to bottom are biceps brachii (red), triceps brachii (yellow), caudofemoralis (green), puboischiotibialis (located on ventral surface of proximal hindlimb; purple) and gastrocnemius (orange).

Lizards were allotted 20–30 min of rest with limited movement to minimize potential locomotor effects of fatigue or stress associated with tail autotomy (Langkilde and Shine, 2006). Data were obtained from a minimum of five forelimb and hindlimb strides for each lizard per tail treatment, in which lizards moved steadily through the field of view (Table S1). One forelimb and hindlimb stride was obtained from each trial and was representative of an individual moving at a relatively constant speed, at least two strides after the initial acceleration. Stride kinematics for each individual were also obtained prior to surgery to ensure that behavior was not significantly altered by the surgery or presence of EMG electrodes.

Animals were euthanized at the conclusion of the experiments using an overdose intraperitoneal injection of sodium pentobarbital (300 mg kg<sup>-1</sup>). Dissections were subsequently performed to verify electrode placement in the forelimb and hindlimb muscles. All animal research was conducted in accordance with the University of California, Riverside Animal Care and Use Protocols (A-20110025 and A-20110038).

### EMG analysis

EMG signals were amplified 10,000 times using GRASS QP511 quad amplifiers (Natus Neurology Inc., Warwick, RI, USA) with a 60 Hz notch filter and low- and high-bandpass filters of 0.1 Hz and 3000 Hz, respectively. Signals were recorded at 5000 samples s<sup>-1</sup> using a BIOPAC MP150 data acquisition system with the UIM100C module and AcqKnowledge 4.0.0 software (BIOPAC Systems, Inc., Goleta, CA, USA). An external trigger was used to synchronize EMG and video data.

EMG signals were bandpass filtered (2500 Hz and 70 Hz high- and low-bandpass filtered, respectively) and rectified. Signal noise was then subtracted from the rectified EMG signals. These signals were used to calculate two amplitude variables: the magnitude of peak burst amplitude and the total rectified integrated area (RIA), which reflects the relative proportion of the muscle that was active during the period of time for which it was calculated. These variables were expressed relative to the maximum amplitude ever observed for that muscle per individual in order to allow for comparisons between treatments and individuals. In addition to these amplitude variables, several timing variables were calculated, including onset and offset for each burst of muscle activity, burst duration and the timing of peak burst amplitude. All timing variables were standardized by stride duration and expressed relative to footfall. To approximate the shape of the EMG burst, the time at which half of the total burst RIA was achieved was calculated and expressed relative to burst duration (Roberts et al., 2007). Extensive details of how each of these variables were calculated are available elsewhere (Foster and Higham, 2014).

### Stride kinematics

High-speed video of locomotor movements was recorded simultaneously with the EMG signals using two Edgertronic SC1 cameras (Sanstreak Corp., San Jose, CA, USA) at 250 frames s<sup>-1</sup> with a shutter speed of 1/2000 s. A pre-measured calibration object constructed of LEGO™ blocks was used to generate *x*, *y* and *z* coordinates for digitizing. Points marked on the animals were digitized using DLTdv5 custom software (Hedrick, 2008) for MATLAB (version R2012a, The MathWorks, Natick, MA, USA). These 3D points were used to calculate body speed and joint angles for the forelimb and hindlimb throughout each stride. Body speed was calculated using the marker on the midpoint of the back. Details of these calculations are available elsewhere (Foster and Higham, 2012; Jagnandan et al., 2014).

To link muscle function to joint kinematics, EMG signals and kinematic variables from strides of different lengths were averaged by dividing values from stance and swing phases into 40 and 20 equal-duration bins, respectively. This is consistent with a duty factor of roughly 70%, as previously observed in *E. macularius* (Jagnandan et al., 2014). The resulting trace for each muscle was then compared with the binned kinematic data to observe the timing of muscle activity relative to angular changes in the limb joints.

### Statistical analyses

Averages of each EMG and kinematic variable for each individual before and after autotomy were used for all statistical analyses. The effects of speed on forelimb and hindlimb muscle activity and joint kinematics were removed by regressing the variables against body speed. Residuals of the variables that expressed a significant relationship ( $\alpha \leq 0.10$ ) with speed were used for subsequent statistical analyses, while all other data were analyzed in their original form. To test for significant differences between mean values of pre- and post-autotomy treatments, paired *t*-tests were used for pairwise comparisons. (Paired *t*-tests were also used to compare pre- and post-surgery trials for five individuals.) Assumptions for normality and equal variances were not violated for any of the variables measured based on Shapiro–Wilk tests and Levene's tests, respectively. All statistical analyses were performed using SYSTAT 13.00.05.

### RESULTS

Details of the changes in limb kinematics that occur with tail autotomy have been published in extensive detail elsewhere (Jagnandan et al., 2014; Jagnandan and Higham, 2017). Despite moving at significantly slower speeds than individuals of the same species in previous studies (Fuller et al., 2011; Jagnandan et al., 2014; Jagnandan and Higham, 2017), geckos in this study exhibited the same changes in kinematics after tail autotomy, and no differences were observed before and after implantation of EMG electrodes. Briefly, geckos exhibited no differences in joint angle during flexion and extension of the forelimbs (Fig. 2A,B), while significant decreases in femur retraction (Fig. 3A,B), ankle angle (Fig. 4A,B), femur depression (Fig. 5A,B) and knee angle (Fig. 5C,D) were observed after the tail was removed.

The timing, but not necessarily the level, of muscle activity was consistent with hypothesized functions of the muscles in relation to movement at the joints (Zaaf et al., 1999) (Figs 2–5). The biceps brachii exhibited two bursts of activity during the stride (Fig. 2C,D). The first began just before footfall and persisted through the first half of stance, which is consistent with flexion of the elbow that occurs in the beginning of the stance phase. This was followed by a second smaller burst just before the swing phase, coinciding with elbow flexion as the foot is lifted off the ground. Similarly, the triceps brachii also had multiple bursts that correspond with extension of the elbow in the second half of stance and again in the second half of swing before footfall (Fig. 2E,F). However, the burst in late swing was lower in magnitude than the stance bursts.

The caudofemoralis was characterized by a single prolonged burst of activity beginning at or just before footfall that persisted throughout the entire stance phase (Fig. 3C,D). Higher amplitudes were generally observed near the beginning of the burst, as indicated by a relatively early time of half-burst RIA. Caudofemoralis activity occurred as the femur was retracted throughout stance (Fig. 3). The gastrocnemius remained active throughout much of stance as well, but was also characterized by a high-amplitude burst near the end of

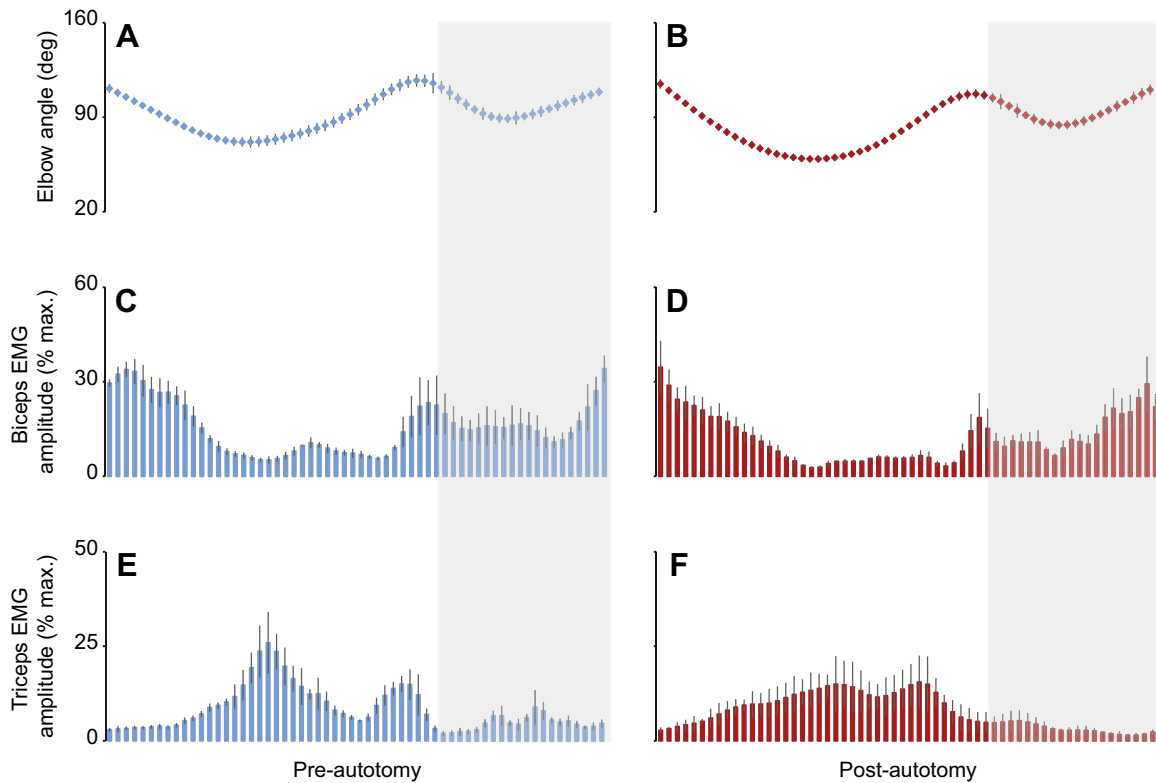

**Fig. 2. Elbow angle and forelimb muscle activity before and after autotomy.** Binned elbow angle (A,B) and binned EMG amplitude of the biceps brachii (C,D) and triceps brachii (E,F) are displayed throughout stance (unshaded) and swing (shaded) phases. Data are shown for pre-autotomy (blue; A,C,E) and post-autotomy (red; B,D,F) treatments. Values are means from 10 individuals. Error bars are s.e.m.

swing phase (Fig. 4C,D). The ankle was extended by the gastrocnemius in the second half of stance and again near the end of swing (Fig. 4A,B). Activity of the puboischiotibialis consisted of a prolonged burst throughout stance that coincided with a gradual depression of the femur, and a higher amplitude burst at the beginning of swing as the knee was flexed as it was moved forward (Fig. 5).

Statistical differences in the effects of the removal of the tail via autotomy are summarized in Tables 1–3. Amplitude and timing

variables of the forelimb muscles were not significantly affected by the anteriorly shifted CoM due to autotomy. In contrast, the caudofemoralis incurred a significant reduction in maximum amplitude and stance RIA after the tail was removed. A significant decrease in amplitude variables was also evident in the first burst of activity (during stance) in the gastrocnemius. Interestingly, timing variables and the shape of the bursts were not significantly altered in these hindlimb muscles. Despite significant reductions in femur depression and knee angle, no

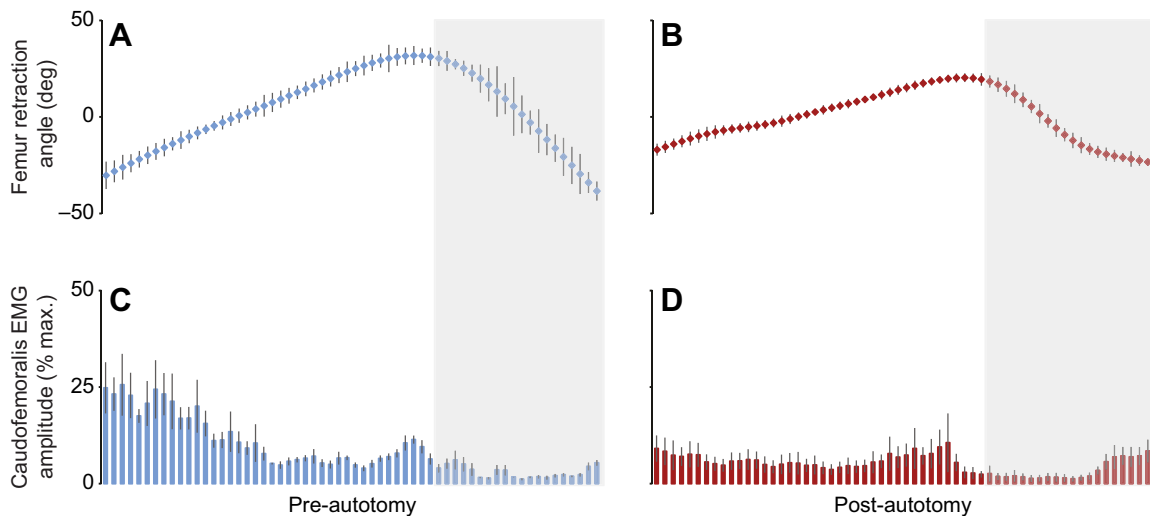

**Fig. 3. Femur retraction angle and caudofemoralis muscle activity before and after autotomy.** Binned femur retraction angle (A,B) and binned EMG amplitude of the caudofemoralis (C,D) are displayed throughout stance (unshaded) and swing (shaded) phases. Data are shown for pre-autotomy (blue; A,C) and post-autotomy (red; B,D) treatments. Values are means from 10 individuals. Error bars are s.e.m.

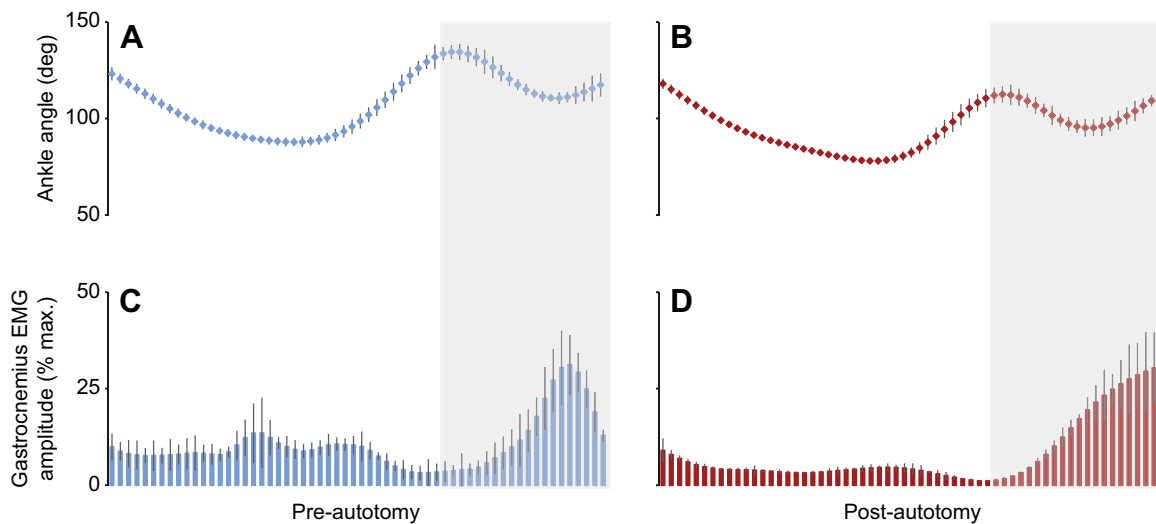

**Fig. 4. Ankle angle and gastrocnemius muscle activity before and after autotomy.** Binned ankle angle (A,B) and binned EMG amplitude of the gastrocnemius (C,D) are displayed throughout stance (unshaded) and swing (shaded) phases. Data are shown for pre-autotomy (blue; A,C) and post-autotomy (red; B,D) treatments. Values are means from 10 individuals. Error bars are s.e.m.

statistical differences in amplitude, timing or shape of the activity bursts of the puboischiotibialis were observed.

## DISCUSSION

### The impact of tail autotomy on muscle activation

Tail autotomy in lizards results in a significant loss of mass and an anterior shift in CoM, resulting in modulation of limb kinematics to compensate for the changes that occur (Jagnandan et al., 2014). *In vivo* muscle activity in *E. macularius* revealed differential

impacts of autotomy on locomotor muscles throughout the forelimbs and hindlimbs. Specifically, we observed no shifts in muscle activity in the forelimbs and a significant reduction in motor recruitment in propulsive muscles of the hindlimbs. Muscles that regulate locomotor posture, however, did not change in amplitude or timing of activation.

Although the link between neuromuscular control and locomotor kinematics is well supported (de Leon et al., 1994; Reilly et al., 2005; Higham and Biewener, 2008; Schilling et al., 2009), changes

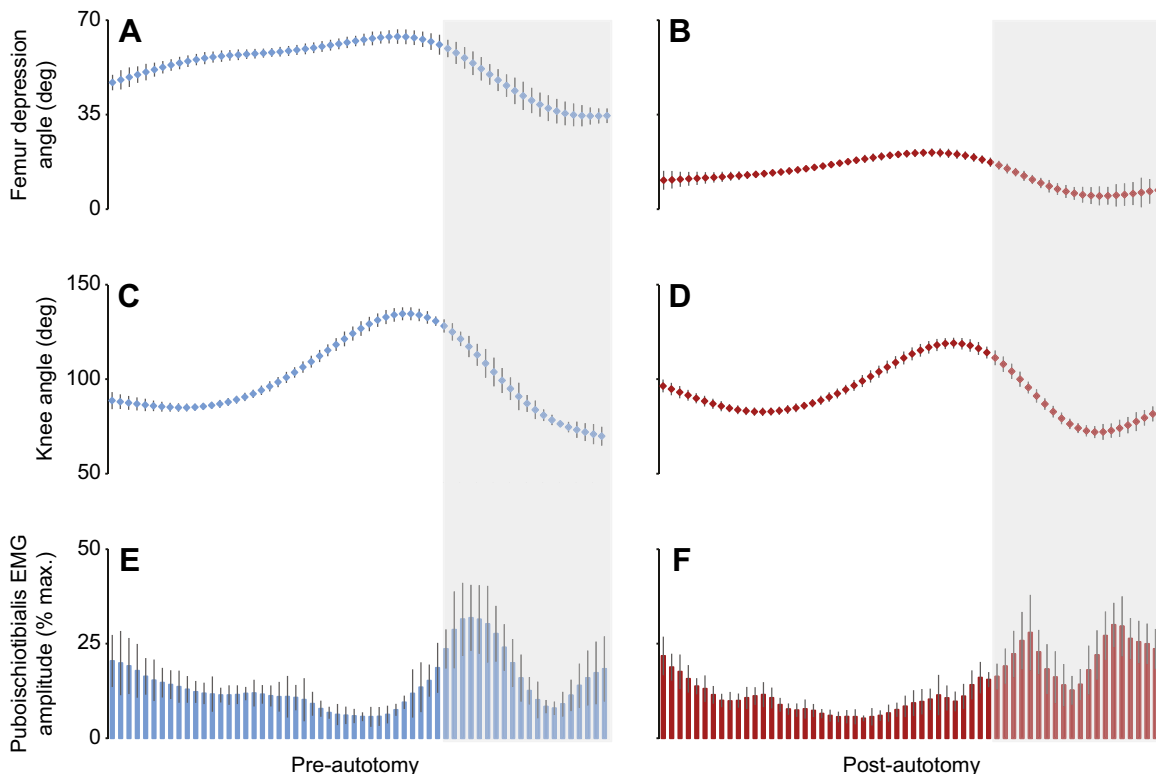

**Fig. 5. Femur depression, knee angle and puboischiotibialis muscle activity before and after autotomy.** Binned femur depression angle (A,B), binned knee angle (C,D) and binned EMG amplitude of the puboischiotibialis (E,F) are displayed throughout stance (unshaded) and swing (shaded) phases. Data are shown for pre-autotomy (blue; A,C,E) and post-autotomy (red; B,D,F) treatments. Values are means from 10 individuals. Error bars are s.e.m.



**Table 1. Stance RIA for each studied muscle before and after tail autotomy in *Eublepharis macularius***

| Muscle             | Pre-autotomy | Post-autotomy | t-Statistic | P                |
|--------------------|--------------|---------------|-------------|------------------|
| Biceps             | 72.81±4.98   | 60.53±5.87    | 1.301       | 0.229            |
| Triceps            | 60.45±5.43   | 69.80±6.57    | -0.925      | 0.382            |
| Caudofemoralis     | 74.85±4.58   | 30.85±9.58    | 6.450       | <b>&lt;0.001</b> |
| Gastrocnemius      | 72.22±3.43   | 57.79±3.68    | 8.281       | <b>&lt;0.001</b> |
| Puboischiotibialis | 53.43±7.02   | 48.89±8.93    | 0.180       | 0.861            |

Means ( $\pm$ s.e.m.) for stance rectified integrated area (RIA) are given for pre-autotomy and post-autotomy. Values are expressed relative to the maximum amplitude observed for each muscle. Statistical significance (paired *t*-tests) of changes in each variable is also given. Significant results are in bold.

in muscle activity are not always coupled with changes in kinematics. When faced with external demands on locomotion, motor control may be altered to counteract the altered demand in order to preserve limb kinematics, or vice versa (Foster and Higham, 2014). Thus, although forelimb kinematics have been previously shown to be unaffected by tail autotomy, modulation of muscle activation in the forelimb muscles in response to a shift in load distribution via autotomy was expected. In running dogs, for example, artificially shifting the CoM forward using added weights increased the contribution of the forelimbs to acceleration (Lee, 2011; Walter and Carrier, 2011). Interestingly, we found that motor control patterns of the biceps brachii and triceps brachii were not decoupled from forelimb kinematics in our study, as no changes in the amplitude or timing of the activation of these muscles were observed. These data suggest that, despite the anterior shift in CoM and theoretical increase in load on the forelimbs, biomechanical compensation for tail autotomy takes place primarily in the hindlimbs, the site that is closer to where the morphological change occurs.

The primary neuromuscular changes that occurred in the hindlimbs were observed in the muscles that drive propulsion. The caudofemoralis is a propulsive muscle of particular interest in regard to autotomy because of its critical role in retracting the femur (Snyder, 1952; Snyder, 1954, 1962; Russell and Bauer, 1992;

Reilly, 1995; Irschick and Jayne, 1999; Nelson and Jayne, 2001) and its point of origin at the proximal caudal vertebrae (Snyder, 1962; Zaaf et al., 1999). Tail autotomy occurs most proximally at a vertebral fracture plane that is distal to the origin of the caudofemoralis, so the muscle remains intact after removal of the tail (Russell and Bauer, 1992). However, our results suggest that its functional role in locomotion may be altered. A notable decrease in the amplitude of activation of the caudofemoralis occurs throughout stance phase after autotomy (Fig. 3C,D), which is consistent with the loss of mass as the animal requires less work from the muscles to move the body, as well as a reduction in retraction of the femur. However, EMG signals also reveal a higher amplitude of activation just after footfall in intact geckos, despite femur retraction occurring continuously throughout stance. This suggests a secondary function that may be related to movements of the tail during locomotion. During steady locomotion, the tail of *E. macularius* is laterally undulated, with the base of the tail flexed toward the protracted hindlimb during each cycle of limb movement. We hypothesize that this high amplitude of muscle activity at footfall is functionally related to the swinging of the tail toward the hindlimb that is beginning stance, as the early caudofemoralis burst is absent in autotomized geckos.

Additionally, the gastrocnemius exhibits a reduced amplitude and RIA of muscle activity (Tables 1 and 3) that is consistent with a reduction in ankle extension in the second half of stance (Fig. 4). This again suggests that with the loss of mass via autotomy, less force is needed to propel the gecko forward, and the activation of the propulsive muscle is modulated accordingly. Geckos also exhibit a small increase in ankle angle near the end of the stride as the ankle is extended just before footfall. A large burst of activity of the gastrocnemius is present at the end of the stride that corresponds with this extension of the ankle, but this burst is not altered by autotomy. This suggests that only propulsion in the stance phase is impacted by autotomy, while muscle activity when the hindlimb is off the ground is unaltered. Moreover, the high amplitude of this second burst suggests a functional role besides extension of the ankle. We hypothesize that the activity of the gastrocnemius just

**Table 2. Summary of EMG variables in forelimb muscles of *E. macularius***

| Muscle  | Burst | Kinematics               | Variable                     | Pre-autotomy | Post-autotomy | t-Statistic | P     |
|---------|-------|--------------------------|------------------------------|--------------|---------------|-------------|-------|
| Biceps  | 1     | Elbow flexion (stance)   | Max. burst amplitude         | 49.82±8.63   | 38.44±5.76    | 0.952       | 0.373 |
|         |       |                          | Onset                        | -11.24±1.96  | -12.86±1.81   | 0.628       | 0.550 |
|         |       |                          | Burst duration               | 38.79±2.62   | 42.93±2.93    | -1.245      | 0.253 |
|         |       |                          | Time of max. burst amplitude | 4.62±1.44    | 2.92±4.75     | 0.162       | 0.875 |
|         |       |                          | Time of half-burst RIA       | 44.48±2.70   | 39.11±3.59    | 1.448       | 0.191 |
|         | 2     | Elbow flexion (swing)    | Max. burst amplitude         | 47.12±8.71   | 28.93±5.23    | 2.115       | 0.067 |
|         |       |                          | Onset                        | 56.67±5.29   | 56.28±7.88    | 0.197       | 0.849 |
|         |       |                          | Burst duration               | 30.81±2.21   | 28.78±2.71    | 0.671       | 0.521 |
|         |       |                          | Time of max. burst amplitude | 54.69±2.96   | 61.94±3.90    | -1.590      | 0.150 |
|         |       |                          | Time of half-burst RIA       | 51.49±3.35   | 54.94±2.35    | -1.121      | 0.260 |
| Triceps | 1     | Elbow extension (stance) | Max. burst amplitude         | 35.86±8.15   | 23.62±4.36    | 0.752       | 0.477 |
|         |       |                          | Onset                        | 12.65±2.81   | 8.29±1.70     | 1.127       | 0.297 |
|         |       |                          | Burst duration               | 47.31±3.88   | 51.34±1.86    | -0.800      | 0.450 |
|         |       |                          | Time of max. burst amplitude | 30.35±2.75   | 34.16±3.28    | -0.957      | 0.370 |
|         |       |                          | Time of half-burst RIA       | 56.74±3.18   | 58.53±0.96    | -0.575      | 0.584 |
|         | 2     | Elbow extension (swing)  | Max. burst amplitude         | 6.90±1.76    | 5.58±1.12     | -0.479      | 0.657 |
|         |       |                          | Onset                        | 70.26±1.64   | 69.49±1.21    | 0.141       | 0.895 |
|         |       |                          | Burst duration               | 24.92±1.64   | 19.71±2.23    | 1.778       | 0.150 |
|         |       |                          | Time of max. burst amplitude | 73.52±4.03   | 70.60±2.50    | 0.420       | 0.696 |
|         |       |                          | Time of half-burst RIA       | 55.91±4.50   | 53.16±2.94    | 0.417       | 0.698 |

Means ( $\pm$ s.e.m.) for each variable are given for pre-autotomy and post-autotomy. Amplitude variables (shaded) are expressed relative to the maximum amplitude observed for each muscle. Timing variables (not shaded) are standardized by stride duration and expressed relative to footfall. Statistical significance (paired *t*-tests) of changes in each variable is also given. Significant results are in bold.

**Table 3. Summary of EMG variables in hindlimb muscles of *E. macularius***

| Muscle             | Burst | Kinematics               | Variable                     | Pre-autotomy | Post-autotomy | t-Statistic | P            |
|--------------------|-------|--------------------------|------------------------------|--------------|---------------|-------------|--------------|
| Caudofemoralis     | 1     | Femur retraction         | Max. burst amplitude         | 53.73±9.04   | 21.83±8.01    | 3.705       | <b>0.014</b> |
|                    |       |                          | Onset                        | -1.68±2.26   | -6.90±1.32    | 1.475       | 0.200        |
|                    |       |                          | Burst duration               | 81.45±2.00   | 81.52±0.47    | -0.468      | 0.660        |
|                    |       |                          | Time of max. burst amplitude | 14.01±3.08   | 10.04±3.26    | 0.668       | 0.534        |
|                    |       |                          | Time of half-burst RIA       | 36.94±4.12   | 42.50±2.55    | -1.146      | 0.304        |
| Gastrocnemius      | 1     | Ankle extension (stance) | Max. burst amplitude         | 38.49±5.12   | 15.41±0.69    | 4.747       | <b>0.018</b> |
|                    |       |                          | Onset                        | 6.40±2.30    | 7.66±2.87     | -1.257      | 0.298        |
|                    |       |                          | Burst duration               | 64.41±4.26   | 61.70±3.80    | 2.155       | 0.120        |
|                    |       |                          | Time of max. burst amplitude | 33.79±5.49   | 36.78±7.49    | -0.503      | 0.649        |
|                    |       |                          | Time of half-burst RIA       | 52.15±3.57   | 45.82±5.81    | -0.117      | 0.915        |
|                    | 2     | Ankle extension (swing)  | Max. burst amplitude         | 54.50±5.90   | 56.04±10.87   | -1.453      | 0.384        |
|                    |       |                          | Onset                        | 85.06±2.31   | 76.75±10.37   | 0.174       | 0.890        |
| Puboischiotibialis | 1     | Femur depression         | Max. burst amplitude         | 35.29±8.57   | 31.96±12.27   | 0.652       | 0.550        |
|                    |       |                          | Onset                        | -5.03±1.54   | -2.13±4.72    | -0.491      | 0.649        |
|                    |       |                          | Burst duration               | 49.11±4.08   | 50.55±3.61    | -1.079      | 0.341        |
|                    |       |                          | Time of max. burst amplitude | 21.53±6.75   | 13.78±11.11   | 0.331       | 0.757        |
|                    |       |                          | Time of half-burst RIA       | 45.09±5.47   | 34.71±4.45    | 1.617       | 0.181        |
|                    | 2     | Knee flexion             | Max. burst amplitude         | 39.05±8.94   | 37.23±5.70    | -0.235      | 0.823        |
|                    |       |                          | Onset                        | 60.59±6.56   | 62.14±3.46    | -0.236      | 0.823        |
|                    |       |                          | Burst duration               | 33.98±7.24   | 28.67±2.95    | 0.198       | 0.851        |
|                    |       |                          | Time of max. burst amplitude | 72.12±6.16   | 76.59±3.04    | -0.497      | 0.640        |
|                    |       |                          | Time of half-burst RIA       | 51.02±4.41   | 58.97±7.04    | -0.718      | 0.505        |

Means ( $\pm$ s.e.m.) for each variable are given for pre-autotomy and post-autotomy. Amplitude variables (shaded) are expressed relative to the maximum amplitude observed for each muscle. Timing variables (not shaded) are standardized by stride duration and expressed relative to footfall. Statistical significance (paired *t*-tests) of changes in each variable is also given. Significant results are in bold.

prior to footfall may be associated with braking and stability to stiffen the ankle joint as the foot is brought down to the ground, similar to pre-landing activation of limb muscles in hopping frogs (Gillis et al., 2010; Ekstrom and Gillis, 2015).

The puboischiotibialis exhibited no changes in motor pattern after the mass of the tail was removed, despite significant reductions in femur depression and knee angle. These kinematic changes are indicative of a more sprawled posture, which was proposed to preserve stability as the lizard adjusts to its lower mass and shifted CoM (Jagnandan et al., 2014). Sprawled postures lower an animal's effective mechanical advantage, thereby increasing the demand on the locomotor muscles (assuming all else is constant) (Biewener, 1989a,b, 1990, 2005). Tail autotomy, however, reduces the gecko's mass and vertical ground-reaction force (Jagnandan et al., 2014), thus countering this demand on the support muscles and allowing geckos to support a more sprawled, stable posture without altering motor recruitment in those muscles. Whether the lack of change in muscle activity caused an active change in kinematics or whether the change in kinematics was a passive result of the inability of the muscle to be modulated is not currently understood. A future study could artificially impose loads on the geckos in order to determine the extent to which this muscle can be modulated. If it cannot be modulated, then an increased external load will induce a postural shift. If the load is resisted, then the muscle should exhibit a shift in activation pattern without a change in posture.

### Comparisons with other lizards

Several studies have examined the activity of limb muscles during lizard locomotion, although they are on fairly distantly related species including *Chamaeleo calypttratus* (Higham and Jayne, 2004b), *Anolis carolinensis* (Foster and Higham, 2014), *Dipsosaurus dorsalis* (Nelson and Jayne, 2001), *Sceloporus clarkii* (Reilly, 1995) and *Varanus exanthematicus* (Jayne et al., 1990; Jenkins and Goslow, 1983). Additionally, there is considerable variation in the specific

muscles examined, often limited to the hindlimb (Higham and Jayne, 2004b; Reilly, 1995; Nelson and Jayne, 2001; but see Jenkins and Goslow, 1983).

Two studies have examined the activation patterns of the gastrocnemius in lizards (chameleons: Higham and Jayne, 2004b; fence lizards: Reilly, 1995). Both studies found that the gastrocnemius was active predominantly throughout the first half of the stance phase, with some activation occurring late in swing phase. Our results are strikingly different from these, with most of the activation occurring in swing. It is unclear what role this suggests, but this could imply that the gastrocnemius simply is not recruited as much during stance to propel the relatively slow-moving leopard geckos. Although chameleons are also quite slow, they are arboreal and may exhibit muscle recruitment patterns related to the specialized grasping and propulsive mechanics (Higham and Jayne, 2004a; Higham and Anderson, 2013; Fischer et al., 2010; Krause and Fischer, 2013; Peterson, 1984). Future work should investigate the activation patterns of the gastrocnemius in other geckos, including arboreal and terrestrial species.

The activation patterns of the caudofemoralis have also been examined in several species of lizard, including *A. carolinensis* (Foster and Higham, 2014), *C. calypttratus* (Higham and Jayne, 2004b), *D. dorsalis* (Nelson and Jayne, 2001) and *S. clarkii* (Reilly, 1995). Although most of these studies manipulated factors that were not considered in our study (e.g. perch diameter, perch incline, locomotor speed), a general pattern emerges. Caudofemoralis activity begins in either late swing or early stance and is predominantly active during the first half of stance in order to retract the femur. We found the same result in our pre-autotomy trials with leopard geckos, highlighting the conserved activation of this muscle.

Activation patterns of the puboischiotibialis, a knee flexor and femur depressor, have been examined in *C. calypttratus* (Higham and Jayne, 2004b) and *A. carolinensis* (Foster and Higham, 2014). In most cases, there were two bursts of activity in this muscle: one in

early stance and one in early swing. However, this pattern varies among treatments in *A. carolinensis* (Foster and Higham, 2014). Our results are consistent with this double burst activation pattern, with a burst typically occurring in early stance and early swing.

The forelimb muscles that we examined (the biceps brachii and triceps brachii) have been examined in *V. exanthematicus* (Jenkins and Goslow, 1983). For the biceps brachii of varanids, activity began in late swing but was primarily restricted to the stance phase. However, activity of both muscles was fairly sporadic throughout the stance phase of the stride (Jenkins and Goslow, 1983). We found similar results for the biceps brachii in leopard geckos, with a burst beginning late in swing and continuing into the stance phase, followed by another burst near the end of stance. The triceps of varanids exhibits an isolated burst of activity during swing and another burst within stance. We did not consistently find an isolated burst of activity in swing, which may be related to the slower locomotor speeds of leopard geckos.

### Future directions

Tail autotomy in lizards is an effective natural model for investigating the neuromuscular control of locomotion in response to altered demands. Our findings demonstrate differential responses of limb muscles to the morphological shift that occurs with tail autotomy. Whether these changes in motor control persist or continuously change as the tail is regenerated is something to be addressed in future work using long-term EMG implants. Another interesting follow-up study would combine demands brought on by physiological mechanisms (autotomy) with demands of the environment (e.g. changes in surface grade) to further investigate the adaptability of neuromuscular control of the locomotor system. For example, does mass loss by autotomy help to compensate for the increased demands of locomotion up an incline? Or do the shifts in motor control make navigating demanding terrain more problematic? The answers to these questions will illuminate a greater understanding of muscle plasticity and have broad applications for biomechanical, physiological and evolutionary research.

### Acknowledgements

We thank all members of the Higham Lab for providing helpful feedback on this project. We are especially grateful to K. L. Foster for assistance with coding and analysis of EMG data.

### Competing interests

The authors declare no competing or financial interests.

### Author contributions

Conceptualization: K.J., T.E.H.; Methodology: K.J., T.E.H.; Formal analysis: K.J.; Investigation: K.J.; Resources: T.E.H.; Data curation: K.J.; Writing - original draft: K.J.; Writing - review & editing: K.J., T.E.H.; Visualization: K.J.; Supervision: T.E.H.; Project administration: T.E.H.; Funding acquisition: T.E.H.

### Funding

Financial support was provided by a National Science Foundation grant (IOS-1147043) to T.E.H., and the University of California, Riverside Newell Award presented to K.J.

### Supplementary information

Supplementary information available online at <http://jeb.biologists.org/lookup/doi/10.1242/jeb.179564.supplemental>

### References

Arnold, E. N. (1984). Evolutionary aspects of tail shedding in lizards and their relatives. *J. Nat. Hist.* **18**, 127-169.  
 Bateman, P. W. and Fleming, P. A. (2009). To cut a long tail short: a review of lizard caudal autotomy studies carried out over the last 20 years. *J. Zool.* **277**, 1-14.  
 Biewener, A. A. (1989a). Mammalian terrestrial locomotion and size. *Bioscience* **39**, 776-783.

Biewener, A. A. (1989b). Scaling body support in mammals: limb posture and muscle mechanics. *Science* **245**, 45-48.  
 Biewener, A. A. (1990). Biomechanics of mammalian terrestrial locomotion. *Science* **250**, 1097-1103.  
 Biewener, A. A. (2005). Biomechanical consequences of scaling. *J. Exp. Biol.* **208**, 1665-1676.  
 Carlson-Kuhta, P., Trank, T. V. and Smith, J. L. (1998). Forms of forward quadrupedal locomotion. II. A comparison of posture, hindlimb kinematics, and motor patterns for upslope and level walking. *J. Neurophysiol.* **79**, 1687-1701.  
 Daley, M. A. and Biewener, A. A. (2003). Muscle force-length dynamics during level versus incline locomotion: a comparison of in vivo performance of two guinea fowl ankle extensors. *J. Exp. Biol.* **206**, 2941-2958.  
 Daley, M. A. and Biewener, A. A. (2011). Leg muscles that mediate stability: mechanics and control of two distal extensor muscles during obstacle negotiation in the guinea fowl. *Philos. Trans. R. Soc. B* **366**, 1580-1591.  
 Daley, M. A., Voloshina, A. and Biewener, A. A. (2009). The role of intrinsic muscle mechanics in the neuromuscular control of stable running in the guinea fowl. *J. Physiol.* **587**, 2693-2707.  
 de Leon, R., Hodgson, J. A., Roy, R. R. and Edgerton, V. R. (1994). Extensor- and flexor-like modulation within motor pools of the rat hindlimb during treadmill locomotion and swimming. *Brain Res.* **654**, 241-250.  
 Ekstrom, L. J. and Gillis, G. B. (2015). Pre-landing wrist muscle activity in hopping toads. *J. Exp. Biol.* **218**, 2410-2415.  
 Ellerby, D. J. and Marsh, R. L. (2006). The energetic costs of trunk and distal-limb loading during walking and running in guinea fowl *Numida meleagris*: II. Muscle energy use as indicated by blood flow. *J. Exp. Biol.* **209**, 2064-2075.  
 Fischer, M. S., Krause, C. and Lilje, K. E. (2010). Evolution of chameleon locomotion, or how to become arboreal as a reptile. *Zoology* **113**, 67-74.  
 Foster, K. L. and Higham, T. E. (2012). How forelimb and hindlimb function changes with incline and perch diameter in the green anole, *Anolis carolinensis*. *J. Exp. Biol.* **215**, 2288-2300.  
 Foster, K. L. and Higham, T. E. (2014). Context-dependent changes in motor control and kinematics during locomotion: modulation and decoupling. *Proc. R. Soc. B* **281**, 20133331.  
 Fuller, P. O., Higham, T. E. and Clark, A. J. (2011). Posture, speed, and habitat structure: three-dimensional hindlimb kinematics of two species of padless geckos. *Zoology* **114**, 104-112.  
 Gillis, G. B. and Biewener, A. A. (2002). Effects of surface grade on proximal hindlimb muscle strain and activation during rat locomotion. *J. Appl. Physiol.* **93**, 1731-1743.  
 Gillis, G. B. and Biewener, A. A. (2003). The importance of functional plasticity in the design and control of the vertebrate musculoskeletal system. In *Vertebrate Biomechanics and Evolution* (ed. V. L. Bels, J. P. Gasc and A. Casinos), pp. 57-72. Oxford: BIOS Scientific Publishers.  
 Gillis, G. and Higham, T. E. (2016). Consequences of lost endings: caudal autotomy as a lens for focusing attention on tail function during locomotion. *J. Exp. Biol.* **219**, 2416-2422.  
 Gillis, G. B., Bonvini, L. A. and Irschick, D. J. (2009). Losing stability: tail loss and jumping in the arboreal lizard *Anolis carolinensis*. *J. Exp. Biol.* **212**, 604-609.  
 Gillis, G. B., Akella, T. and Gunaratne, R. (2010). Do toads have a jump on how far they hop? Pre-landing activity timing and intensity in forelimb muscles of hopping *Bufo marinus*. *Biol. Lett.* **6**, 486-489.  
 Gillis, G. B., Kuo, C.-Y. and Irschick, D. (2013). The impact of tail loss on stability during jumping in green anoles (*Anolis carolinensis*). *Physiol. Biochem. Zool.* **86**, 680-689.  
 Griffin, T. M., Roberts, T. J. and Kram, R. (2003). Metabolic cost of generating muscular force in human walking: insights from load-carrying and speed experiments. *J. Appl. Physiol.* **95**, 172-183.  
 Hedrick, T. L. (2008). Software techniques for two- and three-dimensional kinematic measurements of biological and biomimetic systems. *Bioinspir. Biomim.* **3**, 034001.  
 Higham, T. E. and Anderson, C. V. (2013). Function and adaptation in chameleons. In *The Biology of Chameleons* (ed. K. A. Tolley and A. Herrel), pp. 63-83. Berkeley and Los Angeles: University of California Press.  
 Higham, T. E. and Biewener, A. A. (2008). Integration within and between muscles during terrestrial locomotion: effects of incline and speed. *J. Exp. Biol.* **211**, 2303-2316.  
 Higham, T. E. and Jayne, B. C. (2004a). Locomotion of lizards on inclines and perches: hindlimb kinematics of an arboreal specialist and a terrestrial generalist. *J. Exp. Biol.* **207**, 233-248.  
 Higham, T. E. and Jayne, B. C. (2004b). In vivo muscle activity in the hindlimb of the arboreal lizard, *Chamaeleo calyptrotus*: general patterns and the effects of incline. *J. Exp. Biol.* **207**, 249-261.  
 Higham, T. E. and Russell, A. P. (2010). Flip, flop and fly: modulated motor control and highly variable movement patterns of autotomized gecko tails. *Biol. Lett.* **6**, 70-73.  
 Higham, T. E. and Russell, A. P. (2012). Time-varying motor control of autotomized leopard gecko tails: multiple inputs and behavioral modulation. *J. Exp. Biol.* **215**, 435-441.



- Higham, T. E., Russell, A. P. and Zani, P. A.** (2013). Integrative biology of tail autotomy in lizards. *Physiol. Biochem. Zool.* **86**, 603-610.
- Hsieh, S.-T. T.** (2016). Tail loss and narrow surfaces decrease locomotor stability in the arboreal green anole lizard (*Anolis carolinensis*). *J. Exp. Biol.* **219**, 364-373.
- Irschick, D. J. and Garland, T.** (2001). Integrating function and ecology in studies of adaptation: investigations of locomotor capacity as a model system. *Annu. Rev. Ecol. Syst.* **32**, 367-396.
- Irschick, D. J. and Jayne, B. C.** (1998). Effects of incline on speed, acceleration, body posture and hindlimb kinematics in two species of lizard *Callisaurus draconoides* and *Uma scoparia*. *J. Exp. Biol.* **201**, 273-287.
- Irschick, D. J. and Jayne, B. C.** (1999). Comparative three-dimensional kinematics of the hindlimb for high-speed bipedal and quadrupedal locomotion of lizards. *J. Exp. Biol.* **202**, 1047-1065.
- Jagnandan, K. and Higham, T. E.** (2017). Lateral movements of a massive tail influence gecko locomotion: an integrative study comparing tail restriction and autotomy. *Sci. Rep.* **7**, 10865.
- Jagnandan, K. and Higham, T. E.** (2018). How rapid changes in body mass affect the locomotion of terrestrial vertebrates: ecology, evolution and biomechanics of a natural perturbation. *Biol. J. Linn. Soc.* **124**, 279-293.
- Jagnandan, K., Russell, A. P. and Higham, T. E.** (2014). Tail autotomy and subsequent regeneration alter the mechanics of locomotion in lizards. *J. Exp. Biol.* **217**, 3891-3897.
- Jayne, B. C.** (1988). Muscular mechanisms of snake locomotion: an electromyographic study of the sidewinding and concertina modes of *Crotalus cerastes*, *Nerodia fasciata* and *Elaphe obsoleta*. *J. Exp. Biol.* **140**, 1-33.
- Jayne, B. C., Bennett, A. F. and Lauder, G. V.** (1990). Muscle recruitment during terrestrial locomotion: How speed and temperature affect fibre type use in a lizard. *J. Exp. Biol.* **152**, 101-128.
- Jenkins, F. A., Jr and Goslow, G. E.** (1983). The functional anatomy of the shoulder of the Savannah monitor lizard (*Varanus exanthematicus*). *J. Morphol.* **175**, 195-216.
- Jusufi, A., Goldman, D. I., Revzen, S. and Full, R. J.** (2008). Active tails enhance arboreal acrobatics in geckos. *Proc. Natl. Acad. Sci. USA* **105**, 4215-4219.
- Krause, C. and Fischer, M. S.** (2013). Biodynamics of climbing: effects of substrate orientation on the locomotion of a highly arboreal lizard (*Chamaeleo calyptrotus*). *J. Exp. Biol.* **216**, 1448-1457.
- Kuo, C.-Y., Gillis, G. B. and Irschick, D. J.** (2012). Take this broken tail and learn to jump: the ability to recover from reduced in-air stability in tailless green anole lizards [*Anolis carolinensis* (Squamata: Dactyloidae)]. *Biol. J. Linn. Soc.* **107**, 583-592.
- Langkilde, T. and Shine, R.** (2006). How much stress do researchers inflict on their study animals? A case study using a scincid lizard, *Eulamprus heatwolei*. *J. Exp. Biol.* **209**, 1035-1043.
- Lee, D. V.** (2011). Effects of grade and mass distribution on the mechanics of trotting in dogs. *J. Exp. Biol.* **214**, 402-411.
- Marigold, D. S. and Patla, A. E.** (2002). Strategies for dynamic stability during locomotion on a slippery surface: effects of prior experience and knowledge. *J. Neurophysiol.* **88**, 339-353.
- Marsh, R. L.** (1999). How muscles deal with real-world loads: the influence of length trajectory on muscle performance. *J. Exp. Biol.* **202**, 3377-3385.
- McElroy, E. J. and Bergmann, P. J.** (2013). Tail autotomy, tail size, and locomotor performance in lizards. *Physiol. Biochem. Zool.* **86**, 669-679.
- McGowan, C. P., Duarte, H. A., Main, J. B. and Biewener, A. A.** (2006). Effects of load carrying on metabolic cost and hindlimb muscle dynamics in guinea fowl (*Numida meleagris*). *J. Appl. Physiol.* **101**, 1060-1069.
- McGowan, C. P., Kram, R. and Neptune, R. R.** (2009). Modulation of leg muscle function in response to altered demand for body support and forward propulsion during walking. *J. Biomech.* **42**, 850-856.
- Nelson, F. E. and Jayne, B. C.** (2001). The effects of speed on the *in vivo* activity and length of a limb muscle during the locomotion of the iguanian lizard *Dipsosaurus dorsalis*. *J. Exp. Biol.* **204**, 3507-3522.
- Peterson, J. A.** (1984). The locomotion of Chamaeleo (Reptilia: Sauria) with particular reference to the forelimb. *J. Zool. Lond.* **202**, 1-42.
- Pierotti, D. J., Roy, R. R., Gregor, R. J. and Edgerton, V. R.** (1989). Electromyographic activity of cat hindlimb flexors and extensors during locomotion at varying speeds and inclines. *Brain Res.* **481**, 57-66.
- Reilly, S. M.** (1995). Quantitative electromyography and muscle function of the hind limb during quadrupedal running in the lizard *Sceloporus clarki*. *Zoology* **98**, 263-277.
- Reilly, S. M., Willey, J. S., Biknevicius, A. R. and Blob, R. W.** (2005). Hindlimb function in the alligator: integrating movements, motor patterns, ground reaction forces and bone strain of terrestrial locomotion. *J. Exp. Biol.* **208**, 993-1009.
- Roberts, T. J., Marsh, R. L., Weyand, P. G. and Taylor, C. R.** (1997). Muscular force in running turkeys: the economy of minimizing work. *Science* **275**, 1113-1115.
- Roberts, T. J., Higginson, B. K., Nelson, F. E. and Gabaldon, A. M.** (2007). Muscle strain is modulated more with running slope than speed in wild turkey knee and hip extensors. *J. Exp. Biol.* **210**, 2510-2517.
- Russell, A. P. and Bauer, A. M.** (1992). The m. caudifemoralis longus and its relationship to caudal autotomy and locomotion in lizards (Reptilia: Sauria). *J. Zool. Lond.* **227**, 127-143.
- Russell, A. P. and Bels, V.** (2001). Biomechanics and kinematics of limb-based locomotion in lizards: review, synthesis and prospectus. *Comp. Biochem. Physiol.* **131**, 89-112.
- Schilling, N., Fischbein, T., Yang, E. P. and Carrier, D. R.** (2009). Function of the extrinsic hindlimb muscles in trotting dogs. *J. Exp. Biol.* **212**, 1036-1052.
- Snyder, R. C.** (1952). Quadrupedal and bipedal locomotion of lizards. *Copeia* **1952**, 64-70.
- Snyder, R. C.** (1954). The anatomy and function of the pelvic girdle and hindlimb in lizard locomotion. *Am. J. Anat.* **95**, 1-45.
- Snyder, R. C.** (1962). Adaptations for bipedal locomotion of lizards. *Am. Zool.* **2**, 191-203.
- Vitt, L. J., Congdon, J. D. and Dickson, N. A.** (1977). Adaptive strategies and energetics of tail autonomy in lizards. *Ecology* **58**, 326-337.
- Walter, R. M. and Carrier, D. R.** (2011). Effects of fore-aft body mass distribution on acceleration in dogs. *J. Exp. Biol.* **214**, 1763-1772.
- Zaaf, A., Herrel, A., Aerts, P. and De Vree, F.** (1999). Morphology and morphometrics of the appendicular musculature in geckoes with different locomotor habits (Lepidosauria). *Zoomorphol.* **119**, 9-22.
